# Supplementary material for: Routine use of automated FiO2 control in Poland: prospective registry and survey
Source: Frontiers journal article supplement (doi:10.3389/fped.2023.1213310), 2023-08-31
Supplement: Data_Sheet_1.pdf [file Data_Sheet_1.pdf]

## SUPPLEMENT

### Written Survey1

This survey was developed in English, then translated to Polish and sent to the centers.

*Table 1 Compliance with Registry*

Does enrollment reflect actual use ?

|      |                                                                                                                                                      |
|------|------------------------------------------------------------------------------------------------------------------------------------------------------|
| 2014 | Complete (>90%) <input type="checkbox"/> <input type="checkbox"/> <input type="checkbox"/> <input type="checkbox"/> <input type="checkbox"/> No <10% |
| 2015 | Complete (>90%) <input type="checkbox"/> <input type="checkbox"/> <input type="checkbox"/> <input type="checkbox"/> <input type="checkbox"/> No <10% |
| 2016 | Complete (>90%) <input type="checkbox"/> <input type="checkbox"/> <input type="checkbox"/> <input type="checkbox"/> <input type="checkbox"/> No <10% |
| 2017 | Complete (>90%) <input type="checkbox"/> <input type="checkbox"/> <input type="checkbox"/> <input type="checkbox"/> <input type="checkbox"/> No <10% |
| 2018 | Complete (>90%) <input type="checkbox"/> <input type="checkbox"/> <input type="checkbox"/> <input type="checkbox"/> <input type="checkbox"/> No <10% |
| 2019 | Complete (>90%) <input type="checkbox"/> <input type="checkbox"/> <input type="checkbox"/> <input type="checkbox"/> <input type="checkbox"/> No <10% |

For each year, why ?

*Table 2 Overall Impression of A-FiO2*

2a) Rate current subjective impressions about A-FiO2 use

|                            |                                                                                                                                                     |
|----------------------------|-----------------------------------------------------------------------------------------------------------------------------------------------------|
| How often is A-FiO2 used:  | Routinely <input type="checkbox"/> <input type="checkbox"/> <input type="checkbox"/> <input type="checkbox"/> <input type="checkbox"/> Never        |
| Effectiveness of A-FiO2:   | Excellent <input type="checkbox"/> <input type="checkbox"/> <input type="checkbox"/> <input type="checkbox"/> <input type="checkbox"/> Poor         |
| Effectiveness of Alarms:   | Excellent <input type="checkbox"/> <input type="checkbox"/> <input type="checkbox"/> <input type="checkbox"/> <input type="checkbox"/> Excessive    |
| A-FiO2 ever erratic:       | Never <input type="checkbox"/> <input type="checkbox"/> <input type="checkbox"/> <input type="checkbox"/> <input type="checkbox"/> Regularly        |
| Rate of adoption by staff: | Quickly <input type="checkbox"/> <input type="checkbox"/> <input type="checkbox"/> <input type="checkbox"/> <input type="checkbox"/> Resistant      |
| Training by distributor:   | Excellent <input type="checkbox"/> <input type="checkbox"/> <input type="checkbox"/> <input type="checkbox"/> <input type="checkbox"/> Insufficient |

b) Current Indications for use

|                                                     |                                                                                                                                     |
|-----------------------------------------------------|-------------------------------------------------------------------------------------------------------------------------------------|
| all infants receiving respiratory support:          | Yes <input type="checkbox"/> <input type="checkbox"/> <input type="checkbox"/> <input type="checkbox"/> <input type="checkbox"/> No |
| all unstable infants receiving respiratory support: | Yes <input type="checkbox"/> <input type="checkbox"/> <input type="checkbox"/> <input type="checkbox"/> <input type="checkbox"/> No |
| only intubated infants:                             | Yes <input type="checkbox"/> <input type="checkbox"/> <input type="checkbox"/> <input type="checkbox"/> <input type="checkbox"/> No |
| only preterm infants:                               | Yes <input type="checkbox"/> <input type="checkbox"/> <input type="checkbox"/> <input type="checkbox"/> <input type="checkbox"/> No |

### Written Survey 2

This survey was developed in English, then translated to Polish and sent to the centers.

3a) About the benefits of A-FiO2

|                                                 |                                                                                                                                     |
|-------------------------------------------------|-------------------------------------------------------------------------------------------------------------------------------------|
| better maintenance of SpO2 in normoxemia        | Yes <input type="checkbox"/> <input type="checkbox"/> <input type="checkbox"/> <input type="checkbox"/> <input type="checkbox"/> No |
| reducing episodes of extreme SpO2 exposure      | Yes <input type="checkbox"/> <input type="checkbox"/> <input type="checkbox"/> <input type="checkbox"/> <input type="checkbox"/> No |
| reducing the risk of periodic nurse distraction | Yes <input type="checkbox"/> <input type="checkbox"/> <input type="checkbox"/> <input type="checkbox"/> <input type="checkbox"/> No |
| reducing nursing work load                      | Yes <input type="checkbox"/> <input type="checkbox"/> <input type="checkbox"/> <input type="checkbox"/> <input type="checkbox"/> No |
| reducing false/nuisance SpO2 alarms             | Yes <input type="checkbox"/> <input type="checkbox"/> <input type="checkbox"/> <input type="checkbox"/> <input type="checkbox"/> No |

3b) About infants whom A-FiO2 should ideally be used?

|                                                     |                                                                                                                                     |
|-----------------------------------------------------|-------------------------------------------------------------------------------------------------------------------------------------|
| all infants receiving respiratory support:          | Yes <input type="checkbox"/> <input type="checkbox"/> <input type="checkbox"/> <input type="checkbox"/> <input type="checkbox"/> No |
| all unstable infants receiving respiratory support: | Yes <input type="checkbox"/> <input type="checkbox"/> <input type="checkbox"/> <input type="checkbox"/> <input type="checkbox"/> No |
| only intubated infants:                             | Yes <input type="checkbox"/> <input type="checkbox"/> <input type="checkbox"/> <input type="checkbox"/> <input type="checkbox"/> No |
| only preterm infants:                               | Yes <input type="checkbox"/> <input type="checkbox"/> <input type="checkbox"/> <input type="checkbox"/> <input type="checkbox"/> No |

3c) About why A-FiO2 is not used more in this unit ?

|                                                     |                                                                                                                                     |
|-----------------------------------------------------|-------------------------------------------------------------------------------------------------------------------------------------|
| not enough systems with A-FiO2:                     | Yes <input type="checkbox"/> <input type="checkbox"/> <input type="checkbox"/> <input type="checkbox"/> <input type="checkbox"/> No |
| A-FiO2 limited to intubated and NIPPV:              | Yes <input type="checkbox"/> <input type="checkbox"/> <input type="checkbox"/> <input type="checkbox"/> <input type="checkbox"/> No |
| some clinicians do not prefer the vent with A-FiO2: | Yes <input type="checkbox"/> <input type="checkbox"/> <input type="checkbox"/> <input type="checkbox"/> <input type="checkbox"/> No |
| some clinicians do not like A-FiO2:                 | Yes <input type="checkbox"/> <input type="checkbox"/> <input type="checkbox"/> <input type="checkbox"/> <input type="checkbox"/> No |
| clinicians do not like the higher alarm frequency:  | Yes <input type="checkbox"/> <input type="checkbox"/> <input type="checkbox"/> <input type="checkbox"/> <input type="checkbox"/> No |
| A-FiO2 is not always effective:                     | Yes <input type="checkbox"/> <input type="checkbox"/> <input type="checkbox"/> <input type="checkbox"/> <input type="checkbox"/> No |
| lack of adequate training on use of A-FiO2:         | Yes <input type="checkbox"/> <input type="checkbox"/> <input type="checkbox"/> <input type="checkbox"/> <input type="checkbox"/> No |

3d) About problems with A-FiO2

|                                                       |                                                                                                                                     |
|-------------------------------------------------------|-------------------------------------------------------------------------------------------------------------------------------------|
| excessive alarm frequency (alarm fatigue)             | Yes <input type="checkbox"/> <input type="checkbox"/> <input type="checkbox"/> <input type="checkbox"/> <input type="checkbox"/> No |
| over reliance on automatic control (ignoring alarms)  | Yes <input type="checkbox"/> <input type="checkbox"/> <input type="checkbox"/> <input type="checkbox"/> <input type="checkbox"/> No |
| A-FiO2 increase of FiO2 masked clinical deterioration | Yes <input type="checkbox"/> <input type="checkbox"/> <input type="checkbox"/> <input type="checkbox"/> <input type="checkbox"/> No |
| erratic SpO2 control                                  | Yes <input type="checkbox"/> <input type="checkbox"/> <input type="checkbox"/> <input type="checkbox"/> <input type="checkbox"/> No |
| A-FiO2 function stopped                               | Yes <input type="checkbox"/> <input type="checkbox"/> <input type="checkbox"/> <input type="checkbox"/> <input type="checkbox"/> No |
| A-FiO2 SpO2 reading different from SpO2 monitor       | Yes <input type="checkbox"/> <input type="checkbox"/> <input type="checkbox"/> <input type="checkbox"/> <input type="checkbox"/> No |
| Any other problem                                     | Yes <input type="checkbox"/> <input type="checkbox"/> <input type="checkbox"/> <input type="checkbox"/> <input type="checkbox"/> No |

For any of these not NO, discuss and describe both details and frequency

3e) About changes in your use of A-FiO2 that came with increased experience

|                                                      |                                                                                                                                     |
|------------------------------------------------------|-------------------------------------------------------------------------------------------------------------------------------------|
| Setting level for the control range                  | Yes <input type="checkbox"/> <input type="checkbox"/> <input type="checkbox"/> <input type="checkbox"/> <input type="checkbox"/> No |
| Setting of the SpO2 alarm thresholds                 | Yes <input type="checkbox"/> <input type="checkbox"/> <input type="checkbox"/> <input type="checkbox"/> <input type="checkbox"/> No |
| Setting of the SpO2 alarm delay                      | Yes <input type="checkbox"/> <input type="checkbox"/> <input type="checkbox"/> <input type="checkbox"/> <input type="checkbox"/> No |
| Indications for use (infant size, diagnosis, acuity) | Yes <input type="checkbox"/> <input type="checkbox"/> <input type="checkbox"/> <input type="checkbox"/> <input type="checkbox"/> No |

For any of these not NO, discuss and describe details including whether it was unit wide or related to individual clinicians.

3f) About the initial integration of A-FiO2 into your unit

|                                                              |                                                                                                                                     |
|--------------------------------------------------------------|-------------------------------------------------------------------------------------------------------------------------------------|
| Did you receive training from the distributor or manufacture | Yes <input type="checkbox"/> No <input type="checkbox"/>                                                                            |
| Was the initial training adequate?                           | Yes <input type="checkbox"/> <input type="checkbox"/> <input type="checkbox"/> <input type="checkbox"/> <input type="checkbox"/> No |
| Time between training and start of routine use               | _____ weeks                                                                                                                         |
| How long is the orientation for physicians new to A-FiO2     | _____ hours                                                                                                                         |
| How long is the orientation for nurses new to A-FiO2         | _____ hours                                                                                                                         |

3g) About the current use of A-FiO2 in your unit?

|                                                                |                                                                                                                                     |
|----------------------------------------------------------------|-------------------------------------------------------------------------------------------------------------------------------------|
| Prescribed target ranges are part of the medical record        | Yes <input type="checkbox"/> No <input type="checkbox"/>                                                                            |
| Prescribed SpO2 alarm levels are part of the medical record    | Yes <input type="checkbox"/> <input type="checkbox"/> <input type="checkbox"/> <input type="checkbox"/> <input type="checkbox"/> No |
| A-FiO2 is turned on or off only by the attending physician     | Yes <input type="checkbox"/> <input type="checkbox"/> <input type="checkbox"/> <input type="checkbox"/> <input type="checkbox"/> No |
| Target Ranges are set or reset only by the attending physician | Yes <input type="checkbox"/> <input type="checkbox"/> <input type="checkbox"/> <input type="checkbox"/> <input type="checkbox"/> No |
| Alarm delays are set or reset only by the attending physician  | Yes <input type="checkbox"/> <input type="checkbox"/> <input type="checkbox"/> <input type="checkbox"/> <input type="checkbox"/> No |
| SpO2 Alarm delays are usually set at                           | _____ seconds                                                                                                                       |
| SpO2 Alarm delays are on occasion set between                  | _____ - _____ s                                                                                                                     |

### Web-Registry-data fields

The web input pages were all developed in Polish. This Table of the fields was translated to English in the database reports to the primary investigators.

| Field          | Type                       | SAS            |
|----------------|----------------------------|----------------|
| IdClio         | int(10) unsigned           | IdClio         |
| refNo          | varchar(30)                | refNo          |
| delivDate      | datetime                   | delivDate      |
| gender         | enum('m','f','u')          | gender         |
| weight         | int(11)                    | weight         |
| age            | int(11)                    | age            |
| delivRoute     | enum('Cesarean','Vaginal') | delivRoute     |
| gestation      | enum('Single','Multiple')  | gestation      |
| steroids       | enum('NO','YES','No Data') | steroids       |
| resNeopuff     | enum('NO','YES')           | resNeopuff     |
| resAmbuBag     | enum('NO','YES')           | resAmbuBag     |
| resNonInvasive | enum('NO','YES')           | resNonInvasive |

|                                   |                                                                                     |                            |
|-----------------------------------|-------------------------------------------------------------------------------------|----------------------------|
| resFiO2Max                        | int(11)                                                                             | resFiO2Max                 |
| resIntubation                     | enum('NO','YES')                                                                    | resIntubation              |
| resCardiacMassage                 | enum('NO','YES')                                                                    | resCardiacMassage          |
| resDrugs                          | enum('NO','YES')                                                                    | resDrugs                   |
| insure                            | enum('NO','YES')                                                                    | insure                     |
| lisa                              | enum('NO','YES')                                                                    | lisa                       |
| otherSurfactant                   | enum('NO','One','Multiple')                                                         | otherSurfactant            |
| beforeA-FiO2_NCPAP                | enum('NO','YES')                                                                    | beforeA-FiO2_NCPAP         |
| beforeA-FiO2_NIPPV                | enum('NO','YES')                                                                    | beforeA-FiO2_NIPPV         |
| beforeA-FiO2_MV                   | enum('NO','YES')                                                                    | beforeA-FiO2_MV            |
| beforeA-FiO2_HFO                  | enum('NO','YES')                                                                    | beforeA-FiO2_HFO           |
| beforeA-FiO2_FiO2Min              | int(11)                                                                             | beforeA-FiO2_FiO2Min       |
| beforeA-FiO2_FiO2Max              | int(11)                                                                             | beforeA-FiO2_FiO2Max       |
| previousFiO2                      | int(11)                                                                             | previousFiO2               |
| A-FiO2Date                        | datetime                                                                            | A-FiO2Date                 |
| FiO2startSetting                  | int(11)                                                                             | FiO2startSetting           |
| A-FiO2SpO2Mode                    | enum('Invasive','NonInvasive')                                                      | A-FiO2SpO2Mode             |
| A-FiO2SpO2Date                    | datetime                                                                            | A-FiO2SpO2Date             |
| SpO2targetMin                     | int(11)                                                                             | SpO2targetMin              |
| SpO2targetMax                     | int(11)                                                                             | SpO2targetMax              |
| SpO2targetChanged                 | enum('NO','YES')                                                                    | SpO2targetChanged          |
| SpO2alarmMin                      | int(11)                                                                             | SpO2alarmMin               |
| SpO2alarmMax                      | int(11)                                                                             | SpO2alarmMax               |
| A-FiO2SpO2Reason                  | enum('Unit routine','Frequent desaturation episodes','Weaning from oxygen','Other') | A-FiO2SpO2Reason           |
| A-FiO2SpO2Opinion                 | enum('Poor','Moderate','Good','Very good')                                          | A-FiO2SpO2Opinion          |
| A-FiO2SpO2alarmsOpinion           | enum('Frequent persistent','Frequent but not persistent','Infrequent','Rare')       | A-FiO2SpO2alarmsOpinion    |
| weaningDate                       | datetime                                                                            | weaningDate                |
| weaningFiO2                       | int(11)                                                                             | weaningFiO2                |
| supportAfterWeaning_Oxygen        | enum('NO','YES')                                                                    | supAfterWean_Oxygen        |
| supportAfterWeaning_NCPAP         | enum('NO','YES')                                                                    | supAfterWean_NCPAP         |
| supportAfterWeaning_NIPPV         | enum('NO','YES')                                                                    | supAfterWean_NIPPV         |
| supportAfterWeaning_otherInvasive | enum('NO','YES')                                                                    | supAfterWean_otherInvasive |
| outcomesDay28                     | enum('Death','At home','Transferred to other hospital','Still on board')            | outcomesDay28              |
| outcomesDischarge                 | enum('Death','At home','Transferred to other hospital')                             | outcomesDischarge          |
| dischargeDate                     | date                                                                                | dischargeDate              |
| endOfSupportDate                  | datetime                                                                            | endOfSupportDate           |

|               |                                                |               |
|---------------|------------------------------------------------|---------------|
| ROP           | enum('0','I','II','III','IV')                  | ROP           |
| ROPlaser      | enum('NO','YES')                               | ROPlaser      |
| BPD           | enum('No','Mild','Moderate','Severe','NoData') | BPD           |
| PDA           | enum('NO','YES','NoData')                      | PDA           |
| PDA_treatment | enum('Medical','Surgical','No treatment')      | PDA_treatment |
| IVH           | enum('No','Below III','III','IV','NoData')     | IVH           |
| insClio       | datetime                                       | insClio       |
| modifClio     | datetime                                       | modifClio     |
| modifIdOsoba  | varchar(15)                                    | modifIdOsoba  |
| fkIdOsoba     | varchar(15)                                    | fkIdOsoba     |
| lockRecord    | tinyint(1)                                     | lockRecord    |
